# Supplementary material
Source: publisher figshare collection journal article supplement (https://acs.figshare.com/ndownloader/files/4087885)
Supplement: Supplementary file 1 [file 4087885]

*Supporting Information for*

**Ferrocenyl Glycidyl Ether: A Versatile Ferrocene Monomer for Copolymerization with Ethylene Oxide to Water-Soluble, Thermo-Responsive Copolymers**

*Christine Tonhauser,<sup>1,2</sup> Arda Alkan,<sup>2,3</sup> Martina Schömer,<sup>2</sup> Carsten Dingels,<sup>2</sup> Sandra Ritz,<sup>3</sup>*

*Volker Mailänder,<sup>3</sup> Holger Frey,<sup>2</sup> Frederik R. Wurm\*<sup>3</sup>*

<sup>1</sup>Graduate School Materials Science in Mainz, Staudinger Weg 9, D-55128 Mainz, Germany

<sup>2</sup>Institute of Organic Chemistry, Organic and Macromolecular Chemistry, Duesbergweg 10-14, Johannes Gutenberg-Universität Mainz (JGU), D-55128 Mainz, Germany

<sup>3</sup>Max-Planck Institute for Polymer Research (MPI-P), Ackermannweg 10, D-55128 Mainz, Germany

Contact address: [wurm@mpip-mainz.mpg.de](mailto:wurm@mpip-mainz.mpg.de), phone: 0049 6131 379 502, fax: 0049 6131 370

330.

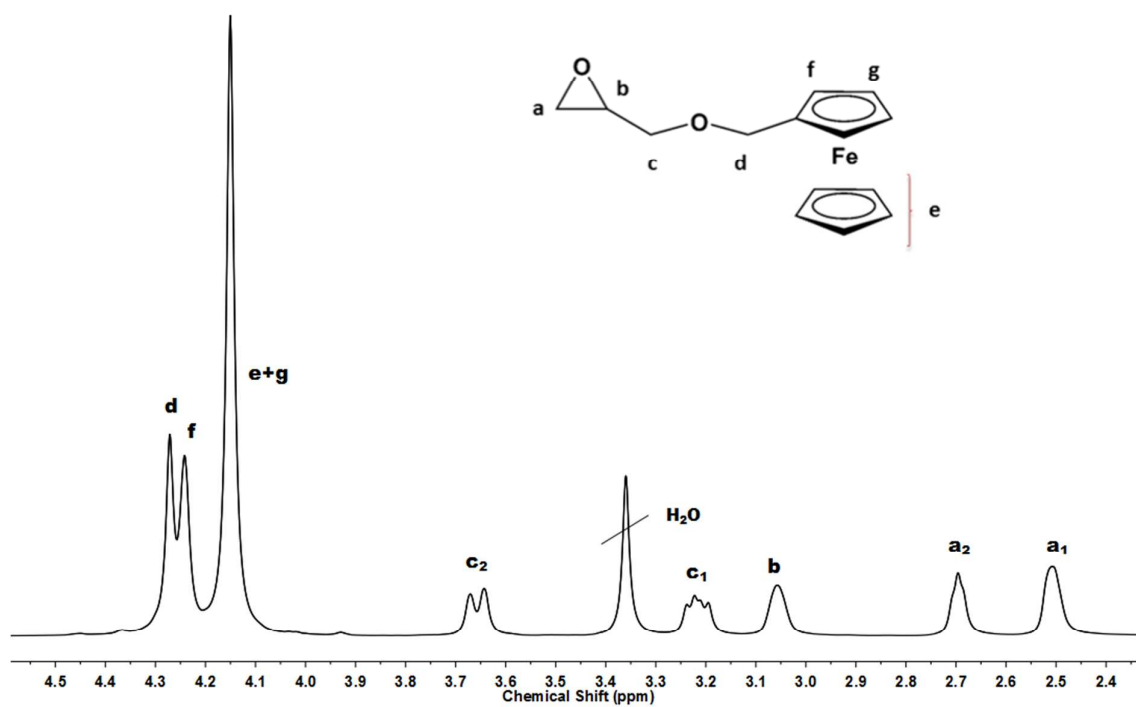

**Figure S1:**  $^1\text{H}$  NMR (400 MHz,  $\text{DMSO}-d_6$ ) of fcGE (1).

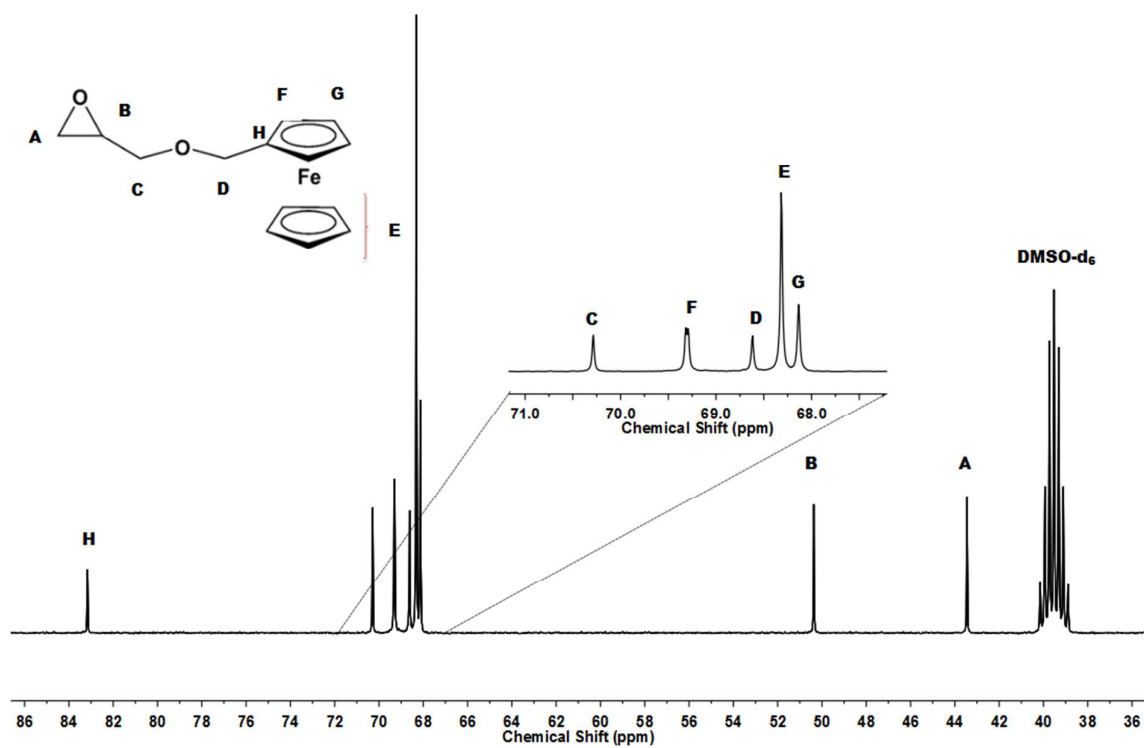

**Figure S2:**  $^{13}\text{C}$  NMR (400 MHz,  $\text{DMSO}-d_6$ ) of fcGE.

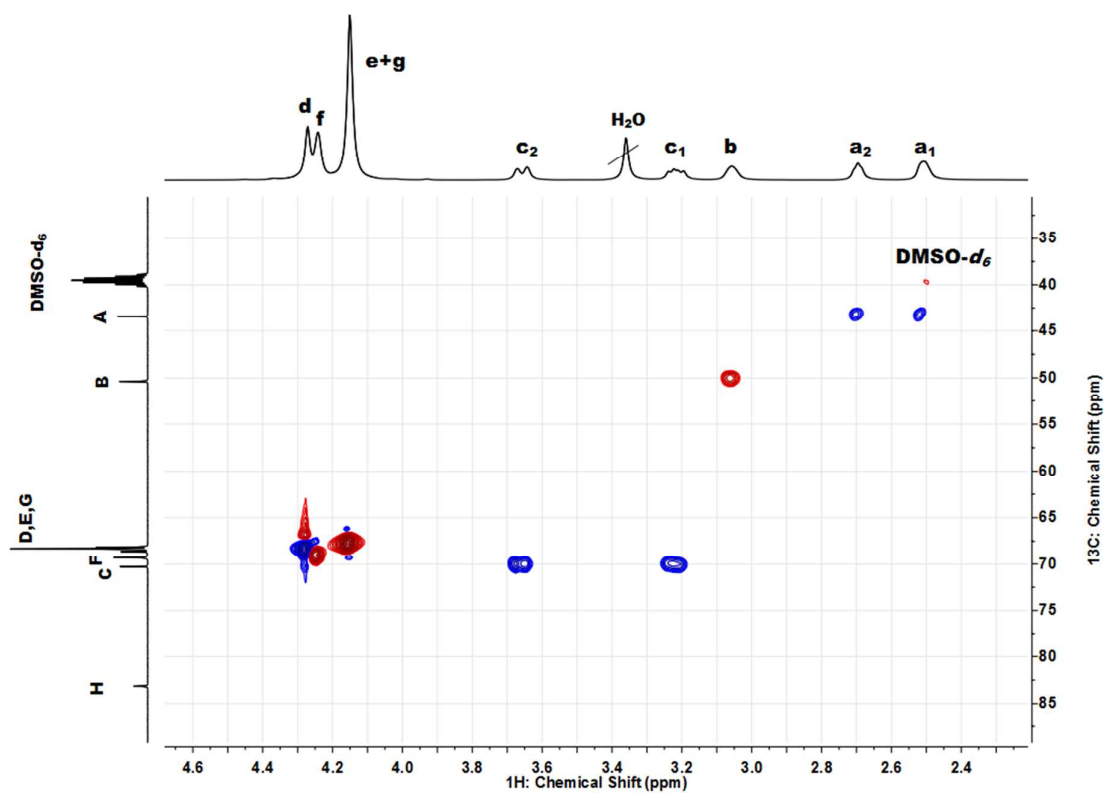

Figure S3: HSQC NMR (400 MHz, DMSO- $d_6$ ) of fcGE.

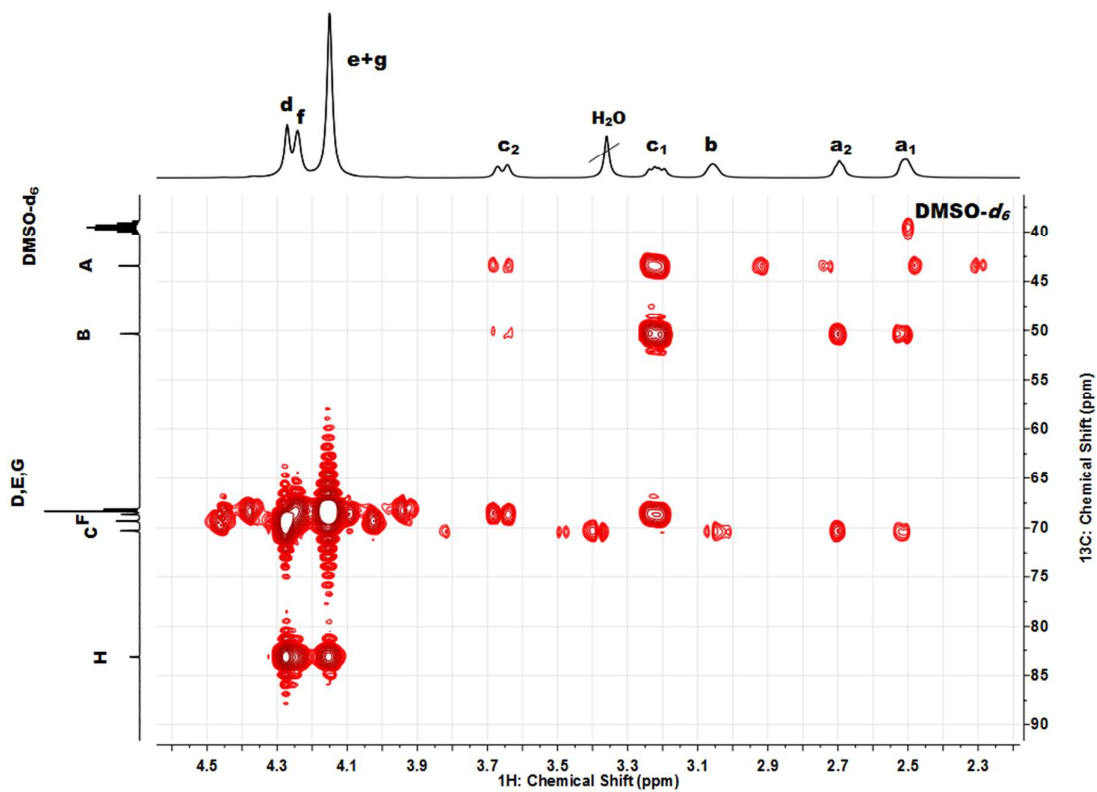

Figure S4: HMBC NMR (400 MHz, DMSO- $d_6$ ) of fcGE.

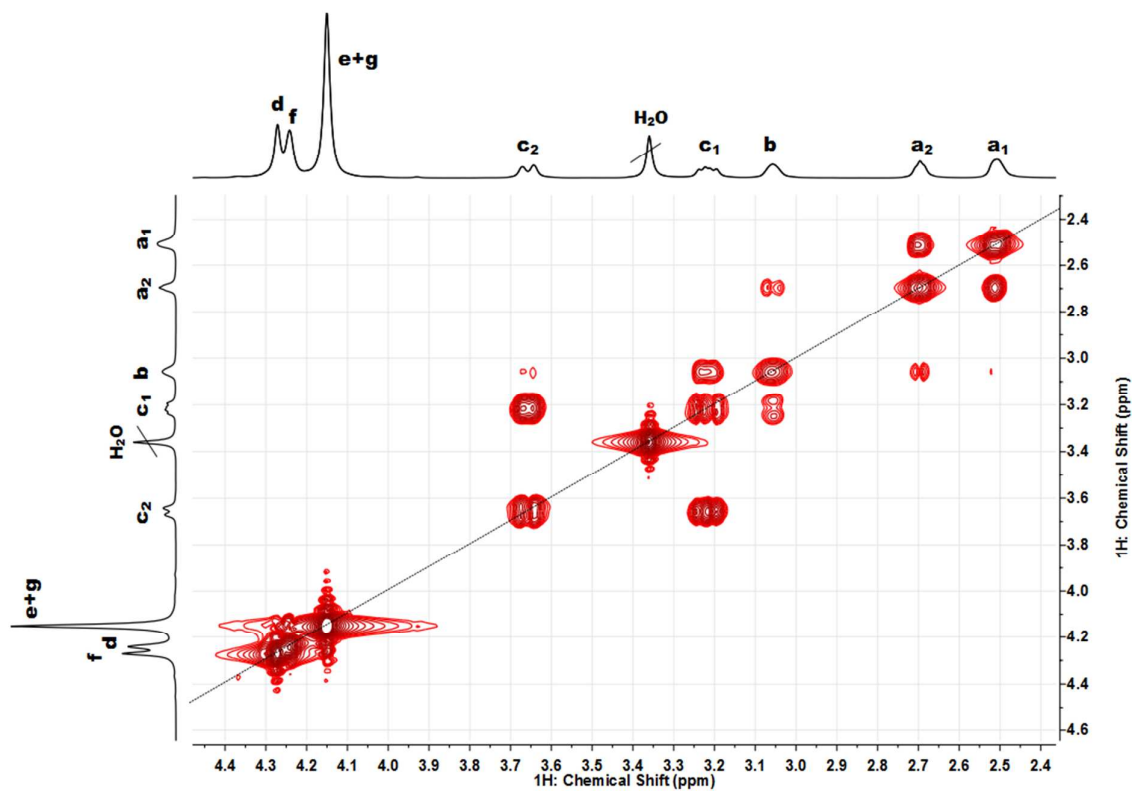

**Figure S5:** COSY NMR (400 MHz, DMSO- $d_6$ ) of fcGE.

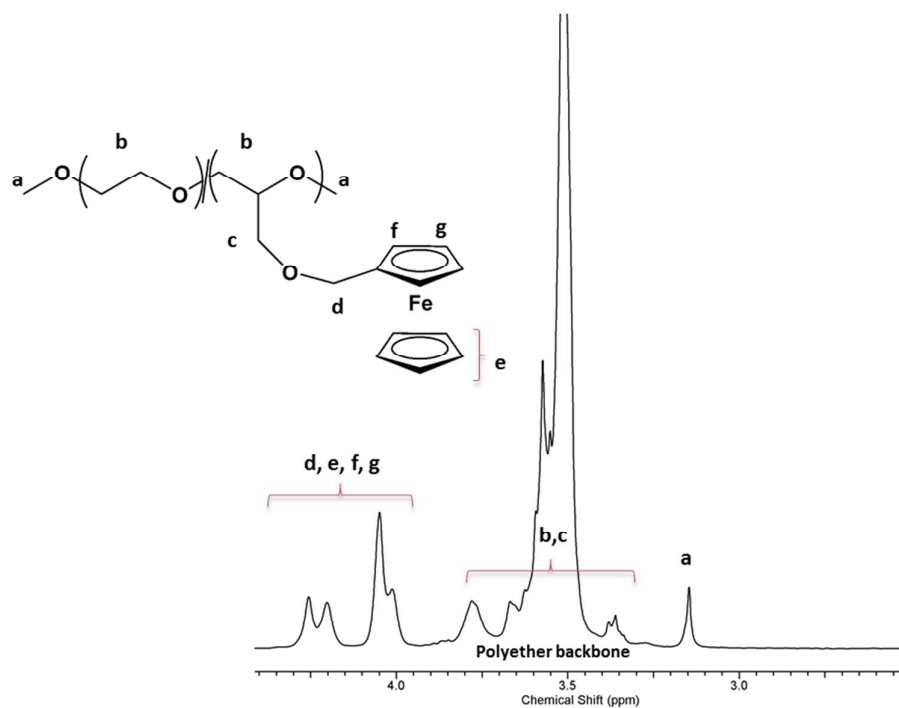

**Figure S6.** Peak assignment of P(EO-co-fcGE)/sample **P3** in  $^1\text{H}$  NMR.

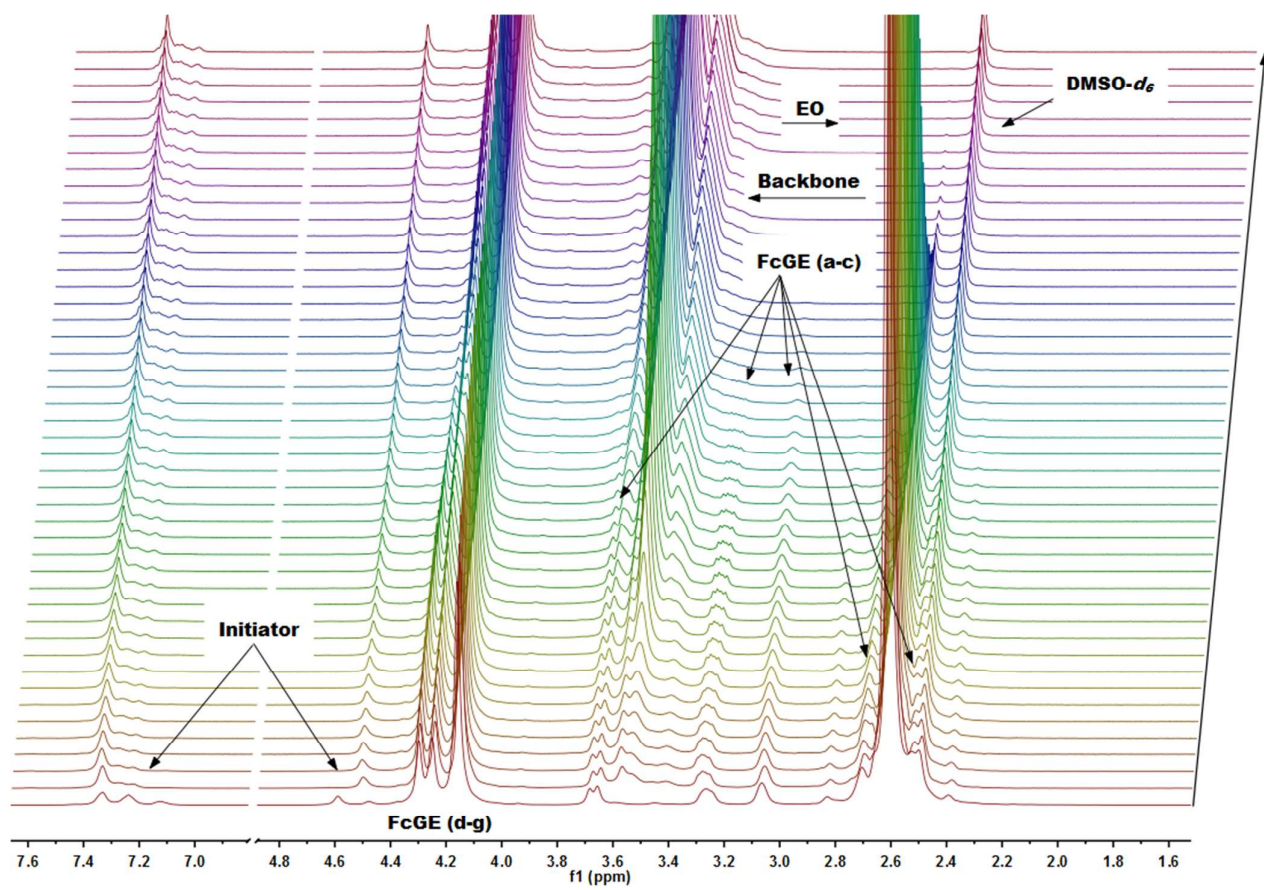

**Figure S7:**  $^1\text{H}$  NMR (400 MHz,  $\text{DMSO-}d_6$ ) kinetics of the copolymerization of EO and fcGE at  $40^\circ\text{C}$  with benzyl alcohol as initiator.

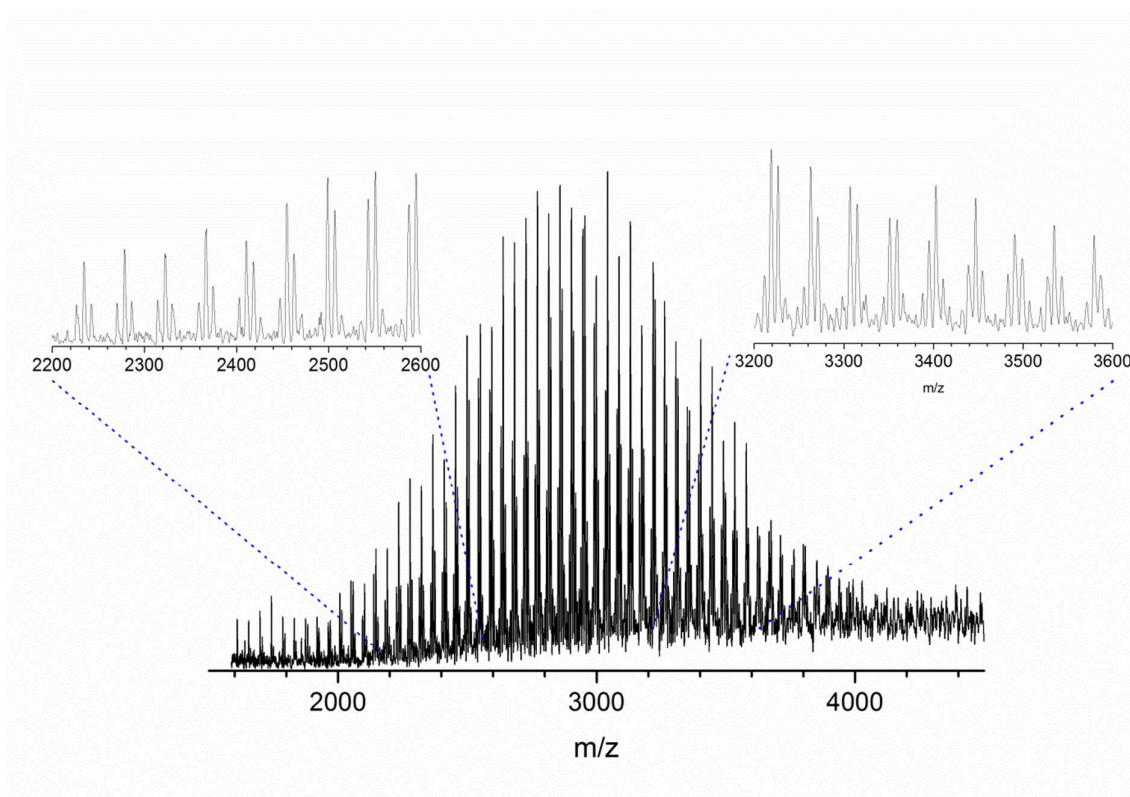

**Figure S8:** MALDI ToF mass spectrum of P(EO-*co*-fcGE)/sample **P5**.

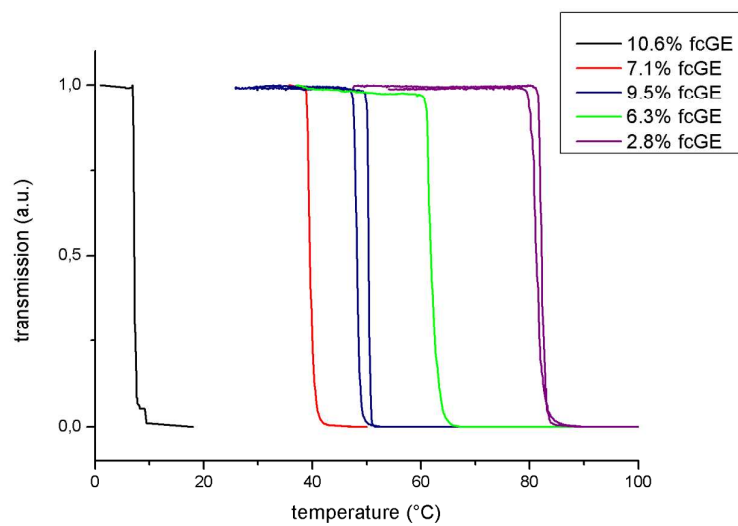

**Figure S9.** Cloud point measurements exhibit reversible LCST behavior.

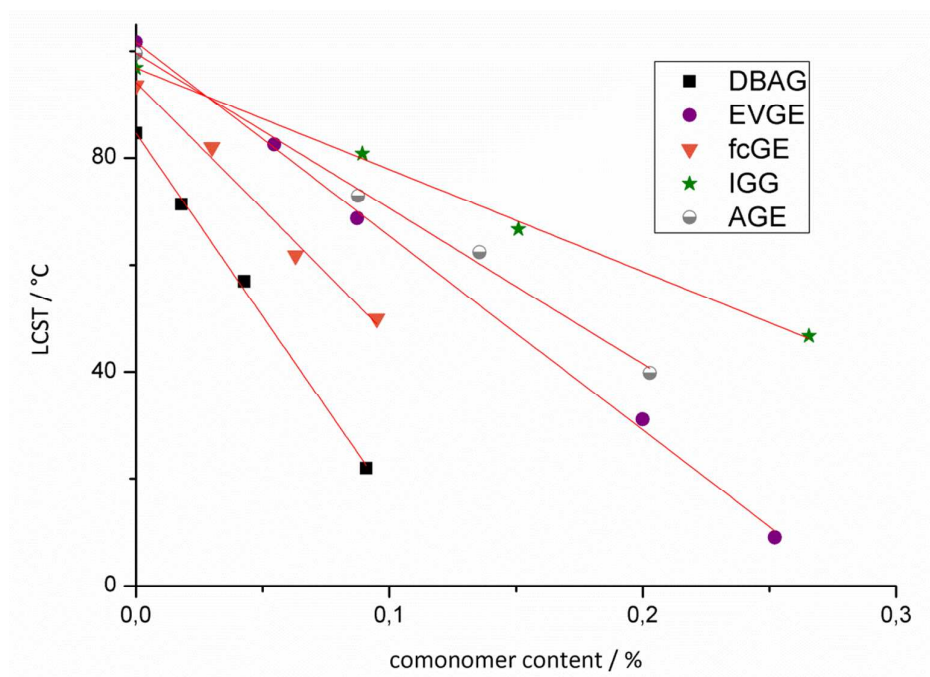

**Figure S10.** LCST temperature versus comonomer content of P(EO-*co*-fcGE) copolymer and other previously described copolyethers.<sup>30</sup>

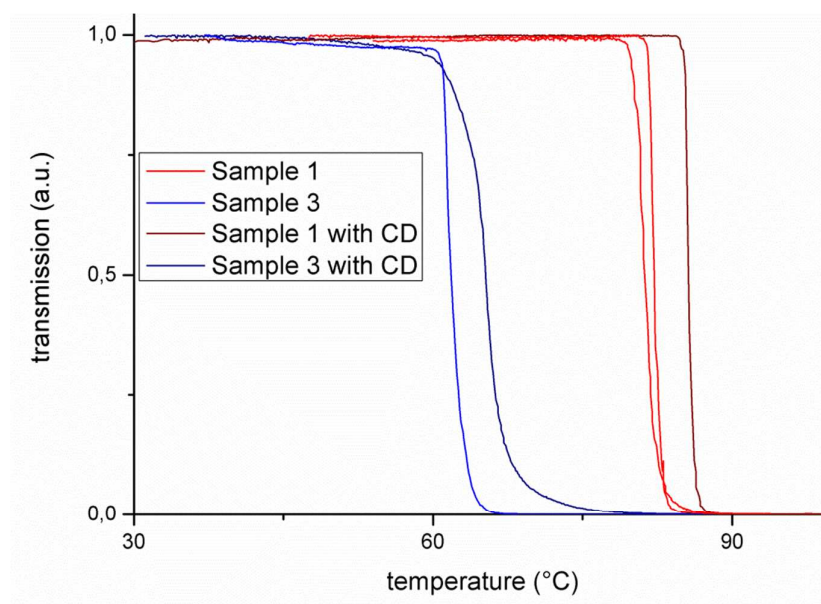

**Figure S11.** Cloud point measurements before and after treatment with  $\beta$ -cyclodextrin.



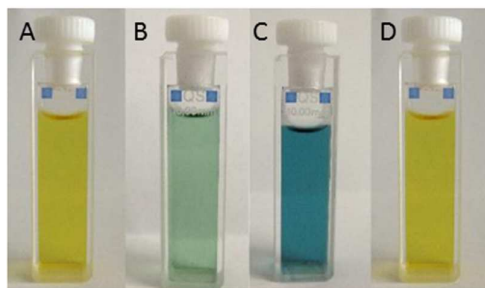

**Figure S12.** **P2** in aqueous solution (A). **P2** in aqueous solution after partly oxidation (B) and complete oxidation (C) with silver(I)triflate. Oxidized **P2** reduced with sodium thiosulfate (D).

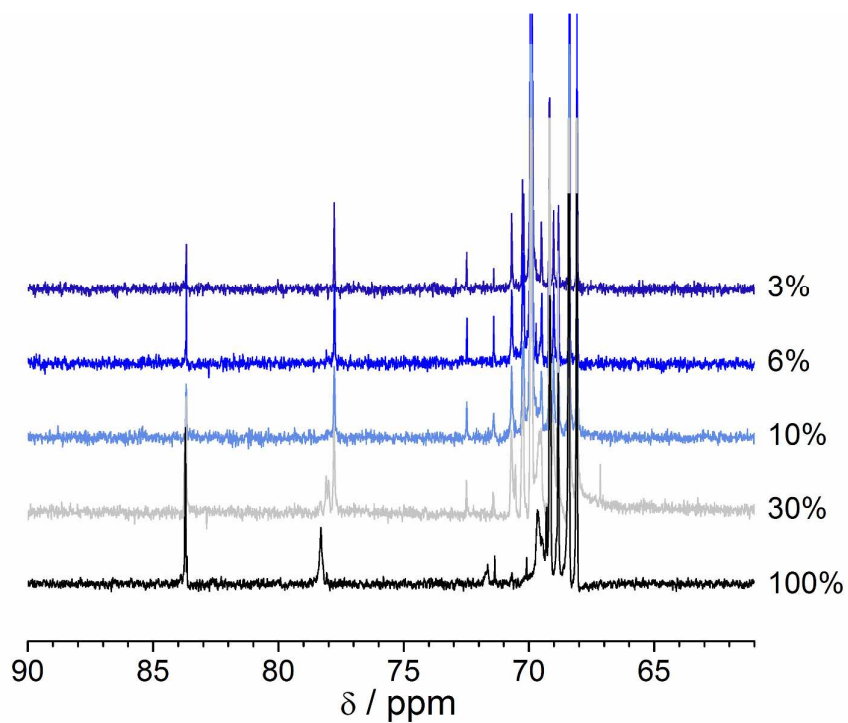

**Figure S13.** A) Complete  $^{13}\text{C}$  NMR spectra of the (co)polymers synthesized in this study and B) zoom on carbon H showing splitting of the signals with increasing amount of fcGE into the copolymers.



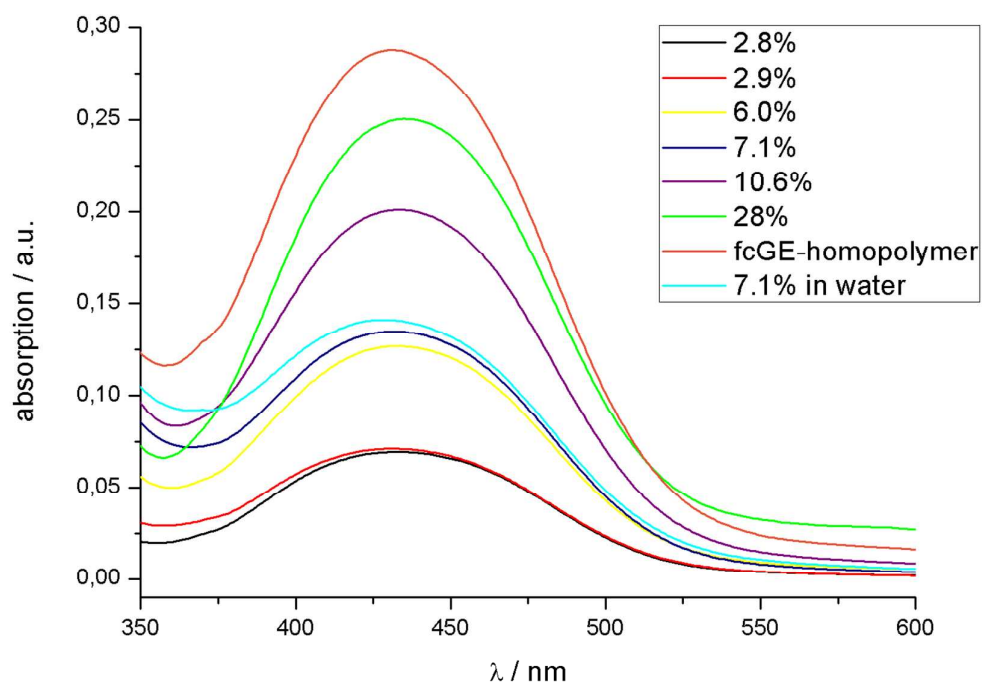

**Figure S14.** UV spectra of (co)polymers in THF (1 g/L) and of **P4** in water.

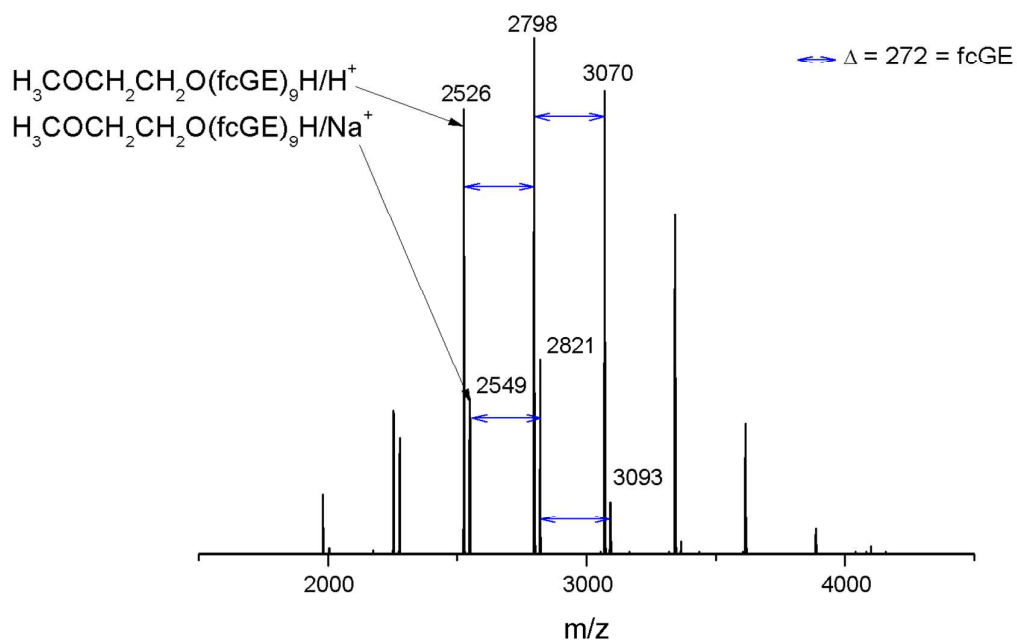

**Figure S15.** MALDI ToF of a fcGE-homopolymer (**P8**).
